# Supplementary material
Source: bioRxiv or medRxiv preprint supplement (https://medrxiv.org/highwire/filestream/76851/field_highwire_adjunct_files/0/2020.04.13.20064006-1.pdf)
Supplement: Supplementary file [file 2020.04.13.20064006-1.pdf]

**Additional File 1:** Significant associations of the variants located within *TTR* target genomic region with the methylation site cg13139646. Information about rsid (SNP), position (BP), effect (BETA), standard error (SE), p value (P), consequence of the variants and the protein substitution for the coding mutations are reported.

| CHR | SNP          | BP       | BETA    | SE     | P      | Variant Consequence | TTR aminoacidic change |
|-----|--------------|----------|---------|--------|--------|---------------------|------------------------|
| 18  | rs28933979   | 29172937 | -1.0680 | 0.4137 | 0.0228 | missense            | Val30Met               |
| 18  | rs72922940   | 29170698 | 1.7080  | 0.7678 | 0.0445 | upstream_gene       | -                      |
| 18  | rs121918085  | 29175144 | 1.7080  | 0.7678 | 0.0445 | missense            | Ile68Leu               |
| 18  | rs76431866   | 29167669 | 1.6240  | 0.7816 | 0.0581 | upstream_gene       | -                      |
| 18  | rs876658108  | 29178612 | 1.6240  | 0.7816 | 0.0581 | missense            | Ala120Ser              |
| 18  | ss1360573709 | 29181175 | 1.6240  | 0.7816 | 0.0581 | downstream_gene     | -                      |
| 18  | ss1360573712 | 29181212 | 1.6240  | 0.7816 | 0.0581 | downstream_gene     | -                      |
| 18  | rs1800458    | 29172865 | -1.1490 | 0.5803 | 0.0693 | missense            | Gly6Ser                |
| 18  | rs144782849  | 29177422 | 0.9921  | 0.6021 | 0.1234 | intron              | -                      |
| 18  | rs35311299   | 29171123 | 1.3130  | 0.8253 | 0.1355 | upstream_gene       | -                      |
| 18  | rs36054463   | 29184368 | -0.6567 | 0.4127 | 0.1355 | intergenic          | -                      |
| 18  | rs1080093    | 29173680 | 0.4930  | 0.4298 | 0.2721 | intron              | -                      |
| 18  | rs71383038   | 29170634 | 0.7380  | 0.8855 | 0.4262 | upstream_gene       | -                      |
| 18  | rs117748556  | 29166726 | -0.5035 | 0.6471 | 0.4505 | upstream_gene       | -                      |
| 18  | rs17740847   | 29165918 | -0.5686 | 0.8882 | 0.5332 | intergenic          | -                      |
| 18  | rs3764478    | 29170483 | -0.5686 | 0.8882 | 0.5332 | upstream_gene       | -                      |
| 18  | rs75032823   | 29179228 | -0.5686 | 0.8882 | 0.5332 | downstream_gene     | -                      |
| 18  | rs1080094    | 29173795 | -0.2282 | 0.3584 | 0.5353 | intron              | -                      |
| 18  | rs140136831  | 29184503 | -0.4254 | 0.8944 | 0.6423 | intergenic          | -                      |
| 18  | rs3764479    | 29169825 | 0.2012  | 0.4476 | 0.6605 | upstream_gene       | -                      |
| 18  | rs1791228    | 29179040 | 0.2012  | 0.4476 | 0.6605 | downstream_gene     | -                      |
| 18  | rs1791229    | 29182352 | 0.2723  | 0.6116 | 0.6634 | downstream_gene     | -                      |
| 18  | rs1473342    | 29183812 | 0.0456  | 0.3681 | 0.9034 | downstream_gene     | -                      |
| 18  | rs121918091  | 29175132 | 0.0137  | 0.6620 | 0.9838 | missense            | Phe64Leu               |
| 18  | rs1667244    | 29167905 | -0.0048 | 0.5089 | 0.9927 | upstream_gene       | -                      |
| 18  | rs67292379   | 29169216 | -0.0048 | 0.5089 | 0.9927 | upstream_gene       | -                      |
| 18  | rs723744     | 29172476 | -0.0048 | 0.5089 | 0.9927 | intron              | -                      |
| 18  | rs3764476    | 29176460 | -0.0048 | 0.5089 | 0.9927 | intron              | -                      |
| 18  | rs1667255    | 29187279 | -0.0048 | 0.5089 | 0.9927 | intergenic          | -                      |
